# Supplementary material
Source: MDPI journal article supplement (https://www.mdpi.com/2075-1702/10/10/957)

| Horns                                                                                                    | Index and middle straight                                                                                | Middle, ring and little straight                                                                           |
|----------------------------------------------------------------------------------------------------------|----------------------------------------------------------------------------------------------------------|------------------------------------------------------------------------------------------------------------|
| <div><div>1</div></div> | <div><div>2</div></div> | <div><div>3</div></div> |
| Index, middle and little straight                                                                        | Index, middle and ring straight                                                                          | Index, ring and little straight                                                                            |
| <div><div>4</div></div>  | <div><div>5</div></div> | <div><div>6</div></div> |

Ring and little straight

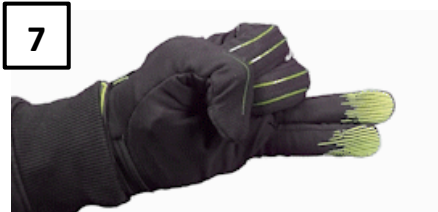

Supplement: s1 [file s1]
