# Supplementary material
Source: MDPI journal article supplement (https://www.mdpi.com/2075-1702/10/10/957)
Supplement: s1 [file s1]

Archive with 1 entries (1 files):
- File S1.pdf
